# Supplementary material for: Algorithms to the Rescue: Market Mechanisms for Consensual Trading of Unbiased Individual Data
Source: Atypon-hosted journal article supplement (doi:10.1287/isre.2024.1115), 2025-03-25
Supplement: isre.2024.1115.sm1.pdf [file isre.2024.1115.sm1.pdf]

# Online Appendix for “Algorithms to the Rescue: Market Mechanisms for Consensual Trading of Unbiased Individual Data”

Brian Birkhead

Coniak Ltd., 2 Titniss Cottages, London Road, Sunninghill, Berkshire SL5 0PP, United Kingdom,  
brian.birkhead@coniak.co.uk

Ashkan Eshghi

Information Systems and Management, Warwick Business School, the University of Warwick, Coventry CV4 7AL, United Kingdom, ashkan.eshghi@wbs.ac.uk

Ram D. Gopal

Information Systems and Management, Warwick Business School, the University of Warwick, Coventry CV4 7AL, United Kingdom, ram.gopal@wbs.ac.uk

Hooman Hidaji

Haskayne School of Business, University of Calgary, 2500 University Drive NW, Calgary, AB T2N 1N4, Canada,  
hooman.hidaji@haskayne.ucalgary.ca

Raymond A. Patterson

Haskayne School of Business, University of Calgary, 2500 University Drive NW, Calgary, AB T2N 1N4, Canada,  
raymond.patterson@ucalgary.ca

---

## Appendix: Proofs

### Proof of Proposition 1:

Given the definition of data subjects’ expected utility in (1), if data subject  $i$  reports  $v'_i$ , then her expected utility is

$$U(v'_i) = \begin{cases} \gamma(\min_{j \neq i}(v'_j)) - \gamma(v_i), & \text{if } v'_i < \min_{j \neq i}(v'_j) \\ 0, & \text{otherwise} \end{cases}$$

Therefore, if data subject  $i$  truthfully reports her privacy concern, her utility is

$$U(v'_i = v_i) = \begin{cases} \gamma(\min_{j \neq i}(v'_j)) - \gamma(v_i), & \text{if } v_i < \min_{j \neq i}(v'_j) \\ 0, & \text{otherwise} \end{cases}$$

From (2) we have  $\frac{\partial \gamma}{\partial v} > 0$ , therefore, if  $\min_{j \neq i}(v'_j) > v_i$ , then  $\gamma(\min_{j \neq i}(v'_j)) - \gamma(v_i) > 0$ . This means that the utility of truth-telling is non-negative, that is  $U(v'_i = v_i) \geq 0$ . In other words, if the mechanism is incentive-compatible, then it is individually rational.

Now we only need to prove that truth-telling is the dominant strategy for all data subjects. We prove this by contradiction. Lets assume that  $v'_i \neq v_i$ , then either  $v'_i > v_i$  or  $v'_i < v_i$ . We consider each case below.

If  $v'_i > v_i$ , that is, if data subject  $i$  over-reports her privacy concern, then

$$\left\{ \begin{array}{ll} \text{if } \min_{j \neq i}(v'_j) > v'_i, & \text{then, } U(v'_i) = U(v_i) = \gamma(\min_{j \neq i}(v'_j)) - \gamma(v_i) \\ \text{if } \min_{j \neq i}(v'_j) < v_i, & \text{then, } U(v'_i) = U(v_i) = 0 \\ \text{if } v_i < \min_{j \neq i}(v'_j) < v'_i, & \text{then, } U(v'_i) = 0, U(v_i) = \gamma(\min_{j \neq i}(v'_j)) - \gamma(v_i) > 0 \Rightarrow U(v'_i) < U(v_i) \end{array} \right.$$

Therefore, the strategy of over-reporting the privacy concern is dominated by the strategy of truth-telling.

On the other hand, if  $v'_i < v_i$ , that is, if data subject  $i$  under-reports her privacy concern, then

$$\left\{ \begin{array}{ll} \text{if } \min_{j \neq i}(v'_j) > v_i, & \text{then, } U(v'_i) = U(v_i) = \gamma(\min_{j \neq i}(v'_j)) - \gamma(v_i) \\ \text{if } \min_{j \neq i}(v'_j) < v'_i, & \text{then, } U(v'_i) = U(v_i) = 0 \\ \text{if } v'_i < \min_{j \neq i}(v'_j) < v_i, & \text{then, } U(v'_i) = \gamma(\min_{j \neq i}(v'_j)) - \gamma(v_i) < 0, U(v_i) = 0 \Rightarrow U(v'_i) < U(v_i) \end{array} \right.$$

Therefore, the strategy of under-reporting the privacy concern is also dominated by the strategy of truth-telling. This means that the mechanism is incentive-compatible, that is, the optimal strategy for all data subjects is truth-telling. ■

### Proof of Proposition 2:

Let  $c_{RSP}$  be the compensation of the Fixed-Compensation method with equivalent Bias as RSP, which is zero.  $B^{FC} = \frac{cn^\alpha - 1}{2}$ , therefore, solving  $B^{FC}(c = c_{RSP}) = 0$  for  $c_{RSP}$  yields  $c_{RSP} = n^{-\alpha}$ . Therefore, the Total Compensation of this method is  $TC^{FC}(c = c_{RSP}) = TC^{FC}(c = n^{-\alpha}) = n^{1-\alpha}$ . Total Compensation of RSP is  $TC^{RSP} = \frac{n+2[\mathbf{H}_{N+2} - \mathbf{H}_{N+2-n}]}{2n^\alpha}$ , thus,

$$TC^{FC}(c = c_{RSP}) - TC^{RSP} = n^{-\alpha} \underbrace{\left[ \frac{n}{2} - \mathbf{H}_{N+2} + \mathbf{H}_{N+2-n} \right]}_{\psi}$$

To prove that the Total Compensation of RSP is less than the corresponding  $FC$  with equivalent Bias, we need to show that  $\psi > 0$ .  $\psi$  is strictly increasing in  $N \in \mathbb{Z}_{>0}$  and  $n \in \mathbb{Z}_{>0}$ . Substituting both  $n$  and  $N$  with 1, we can find the lower-bound of  $\psi$  as  $\frac{1}{2} - \mathbf{H}_3 + \mathbf{H}_2 = \frac{1}{6}$ . Therefore,  $\psi > 0 \forall \{N, n\} \in \mathbb{Z}_{>0}^2$ .

Bias of the Fixed-Compensation method with equivalent Total Compensation as RSP is  $B^{FC}(c = \frac{TC^{RSP}}{n}) = B^{FC}(c = \frac{n+2[\mathbf{H}_{N+2} - \mathbf{H}_{N+2-n}]}{2n^{1+\alpha}})$ . Therefore,

$$B^{FC}(c = \frac{TC^{RSP}}{n}) = \frac{\mathbf{H}_{N+2} - \mathbf{H}_{N+2-n} - \frac{n}{2}}{2n} = \frac{-\psi}{2n} \neq 0 \quad \forall \{N, n\} \in \mathbb{Z}_{>0}^2$$

Therefore,  $|B^{FC}(c = \frac{TC^{RSP}}{n})| > 0$ , which means that  $|B^{FC}(c = \frac{TC^{RSP}}{n})| > |B^{RSP}|$ . ■

**Proof of Proposition 3:**

First, we compare the Total Cost of RSP with FCH.  $\Phi^{FCH} = TC^{FCH} = n^{1-\alpha}$  and  $\Phi^{RSP} = TC^{RSP} = \frac{n+2[\mathbf{H}_{N+2} - \mathbf{H}_{N+2-n}]}{2n^\alpha}$ , thus,

$$\Phi^{FCH} - \Phi^{RSP} = n^{-\alpha} \underbrace{\left[ \frac{n}{2} - \mathbf{H}_{N+2} + \mathbf{H}_{N+2-n} \right]}_{>0 \quad \forall \{N, n\} \in \mathbb{Z}_{>0}^2}$$

Therefore, the Total Cost of RSP is smaller than the Total Cost of FCH, independent of the per unit cost of bias ( $\omega$ ).

Second, we compare the Total Cost of RSP with FCL.  $\Phi^{FCL} = TC^{FCL} + \omega|B^{FCL}|$ , that is,

$$\Phi^{FCL} = \frac{n^{2-\alpha}}{N+1} + \omega \left| \frac{n-N}{2[N+1]} \right| = \frac{2n^{2-\alpha} + \omega[N-n]}{2[N+1]}$$

Solving  $\Phi^{FCL} = \Phi^{RSP}$  for  $\omega$  yields  $\hat{\omega}_L = \frac{[N-2n+1]n+2[N+1][\mathbf{H}_{N+2} - \mathbf{H}_{N+2-n}]}{n^\alpha[N-n+1]}$ .

Comparing  $\hat{\omega}_L$  with  $\hat{\omega}$ , we have

$$\hat{\omega} - \hat{\omega}_L = 2n^{1-\alpha} - \hat{\omega}_L = \frac{2[N+1]}{n^\alpha[N-n]} \underbrace{\left[ \frac{n}{2} - \mathbf{H}_{N+2} - \mathbf{H}_{N+2-n} \right]}_{>0 \quad \forall \{N, n\} \in \mathbb{Z}_{>0}^2}$$

Therefore,  $\hat{\omega}_L < \hat{\omega}$ . ■

**Proof of Proposition 4:**

Average cost of each method is calculated as  $AC = \frac{TC}{n}$ . Average cost of RSP is derived using the approximate value of Total Compensation. From Section 5.4 we know that  $E(TC^{RSP}) = \frac{n^{1-\alpha}}{2} + \frac{\mathbf{H}_{N+2} - \mathbf{H}_{N+2-n}}{n^\alpha}$ , and  $\mathbf{H}_x - \mathbf{H}_y \approx \ln(x) - \ln(y) - \frac{[x-y]}{2xy}$ . Therefore,  $TC^{RSP} \approx \frac{n + \frac{1}{N+2} - \frac{1}{N+2-n} + 2[\ln(N+2) - \ln(N+2-n)]}{2n^\alpha}$ . Average costs of the methods are as follows:

$$\begin{aligned} AC^{FCH} &= \frac{TC^{FCH}}{n} = \frac{1}{n^\alpha} \\ AC^{FCL} &= \frac{TC^{FCL}}{n} = \frac{1}{n^{1-\alpha}[N+1]} \\ AC^{RSP} &= \frac{TC^{RSP}}{n} \approx \frac{n + \frac{1}{N+2} - \frac{1}{N+2-n} + 2[\ln(N+2) - \ln(N+2-n)]}{2n^{\alpha+1}} \end{aligned}$$

To prove Proposition 4(a), it is sufficient to show that the partial derivative of average cost with respect to  $n$  is less than zero for FCH and greater than zero for FCL:

$$\frac{\partial AC^{FCH}}{\partial n} = \frac{\alpha}{n^{\alpha+1}} < 0 \quad \forall n \in \mathbb{Z}_{>0} \text{ \& } \alpha \in [0, 1]$$

$$\frac{\partial AC^{FCL}}{\partial n} = \frac{1 - \alpha}{n^\alpha [N + 1]} > 0 \quad \forall \{N, n\} \in \mathbb{Z}_{>0}^2 \text{ \& } \alpha \in [0, 1]$$

To prove Proposition 4(c), we first derive the partial derivative of average cost with respect to  $n$  for RSP:

$$\begin{aligned} \frac{\partial AC^{RSP}}{\partial n} &\approx \frac{n[1 - \frac{1}{[N+2-n]^2} + \frac{2}{N+2-n}] - [\alpha + 1][n + \frac{1}{N+2} - \frac{1}{N+2-n} + 2[\ln(N+2) - \ln(N+2-n)]]}{2n^\alpha} \\ \Rightarrow \frac{\partial AC^{RSP}}{\partial n} &\begin{cases} > 0, & \text{if } \alpha < \check{\alpha} \\ < 0, & \text{if } \alpha > \hat{\alpha} \end{cases}, \text{ where } \check{\alpha} \approx \frac{1}{N[N-1]} \text{ and } \hat{\alpha} \approx \frac{3}{4} \\ \text{if } \check{\alpha} < \alpha < \hat{\alpha}, &\text{ then } \frac{\partial AC^{RSP}}{\partial n} \begin{cases} < 0, & \text{if } \alpha < \tilde{n} \\ > 0, & \text{if } \alpha > \tilde{n} \end{cases}, \text{ where } \tilde{n} \approx N - \frac{1}{\alpha N}. \quad \blacksquare \end{aligned}$$

### Proof of Proposition 5:

We know that  $B^{COH} = B^{RSP} = 0$ , therefore,  $\Phi^{COH} = TC^{COH}$  and  $\Phi^{RSP} = TC^{RSP}$ . Let  $\tau = \Phi^{COH} - \Phi^{RSP} = TC^{COH} - TC^{RSP}$ , then,

$$\tau = n^{1-\alpha} \left[ \frac{1+d}{2} \right] - \frac{n + 2[\mathbf{H}_{N+2} - \mathbf{H}_{N+2-n}]}{2n^\alpha} = \frac{nd - 2[\mathbf{H}_{N+2} + \mathbf{H}_{N+2-n}]}{2n^\alpha}$$

Solving  $\tau(d = \hat{d}) = 0$  yields  $\hat{d} = \frac{2[\mathbf{H}_{N+2} + \mathbf{H}_{N+2-n}]}{n}$ .  $\tau$  is increasing in  $d$ , therefore  $\tau(d > \hat{d}) > 0$ . This means that for any  $d > \hat{d}$ , the Total Compensation and Total Cost of COH is larger than the Total Compensation and Total Cost of RSP.  $\blacksquare$
